# Supplementary material
Source: PubMed Central journal article supplement (PMC6683637)
Supplement: Supplemental_Material4.pdf [file Supplemental_Material4.pdf]

**Table S1. Univariate and multivariate survival analysis for evaluating the influence of tumor size on cause-specific survival in the validation set.**

| Variable               | 5-year HCSS (%) | Univariate analysis    |         | Multivariate analysis |         |
|------------------------|-----------------|------------------------|---------|-----------------------|---------|
|                        |                 | Log rank $\chi^2$ test | P       | HR(95%CI)             | P       |
| Sex                    |                 | 15.237                 | P<0.001 |                       | P<0.001 |
| Male                   | 31.1%           |                        |         | Ref                   |         |
| Female                 | 33.9%           |                        |         | 0.892(0.847-0.939)    | P<0.001 |
| Age                    |                 | 63.266                 | P<0.001 |                       | P<0.001 |
| ≤45                    | 52.0%           |                        |         | Ref                   |         |
| >45                    | 30.4%           |                        |         | 2.241(2.007-2.503)    | P<0.001 |
| Race                   |                 | 75.271                 | P<0.001 |                       | P<0.001 |
| Caucasian              | 31.4%           |                        |         | Ref                   |         |
| African American       | 23.8%           |                        |         | 1.067(1.004-1.134)    | 0.036   |
| Others*                | 37.6%           |                        |         | 0.819(0.774-0.866)    | P<0.001 |
| Pathological grading   |                 | 474.034                | P<0.001 |                       | P<0.001 |
| High/Moderate          | 41.2%           |                        |         | Ref                   |         |
| Poor/undifferentiation | 22.8%           |                        |         | 1.619(1.504-1.744)    | P<0.001 |
| Unknown                | 28.2%           |                        |         | 1.577(1.500-1.658)    | P<0.001 |
| Stage                  |                 | 3222.311               | P<0.001 |                       | P<0.001 |
| Localized              | 43.0%           |                        |         | Ref                   |         |
| Regional               | 19.3%           |                        |         | 1.830(1.743-1.921)    | P<0.001 |
| Distant                | 7.4%            |                        |         | 2.967(2.788-3.158)    | P<0.001 |
| Unstaged               | 19.9%           |                        |         | 1.765(1.571-1.983)    | P<0.001 |
| Marital Status         |                 | 101.364                | P<0.001 |                       | P<0.001 |
| Married                | 34.7%           |                        |         | Ref                   |         |
| Never married          | 32.6%           |                        |         | 1.063(1.005-1.125)    | 0.034   |
| Divorced/Separated     | 27.6%           |                        |         | 1.172(1.103-1.247)    | P<0.001 |
| Widowed                | 20.5%           |                        |         | 1.329(1.235-1.431)    | P<0.001 |
| Unknown                | 26.6%           |                        |         | 1.060(0.955-1.177)    | 0.272   |
| Tumor size (mm)        |                 | 2575.761               | P<0.001 |                       | P<0.001 |
| 0-38 mm                | 48.1%           |                        |         | Ref                   |         |
| 39-54 mm               | 27.4%           |                        |         | 1.695(1.591-1.807)    | P<0.001 |
| 55-75 mm               | 20.4%           |                        |         | 2.193(2.055-2.341)    | P<0.001 |
| ≥76 mm                 | 15.1%           |                        |         | 2.827(2.672-2.991)    | P<0.001 |

\*including other (American Indian/AK Native, Asian/Pacific Islander) and unknowns.

P values were adjusted for sex, age, race, pathological grading, stage, marital status and tumor size as covariates between the two groups.

**Table S2. Pairwise comparisons between different combinations of tumor size and gender relative to HCSM in the validation set.**

| Variable        | Gender             |         |                    |         |
|-----------------|--------------------|---------|--------------------|---------|
|                 | Male               |         | Female             |         |
|                 | HR (95% CI)        | P       | HR(95%CI)          | P       |
| Tumor size (mm) |                    | P<0.001 |                    | P<0.001 |
| 0-38            | 0.598(0.556-0.643) | P<0.001 | 0.556(0.487-0.634) | P<0.001 |
| 39-54           | 1                  | P<0.001 | 1                  | P<0.001 |
| 55-75           | 1.290(1.190-1.399) | P<0.001 | 1.287(1.113-1.488) | 0.001   |
| ≥76 mm          | 1.781(1.661-1.911) | P<0.001 | 1.343(1.178-1.532) | P<0.001 |

All the results were adjusted using Cox proportional hazards models for age, race, pathological grading, stage, marital status and tumor size.

**Table S3. Univariate and multivariate analyses for evaluating tumor size influencing CSS in HCC based on different cancer stage in the validation set.**

| Variable                  | 5-year CCS(%) | Univariate analysis    |        | Multivariate analysis |        |
|---------------------------|---------------|------------------------|--------|-----------------------|--------|
|                           |               | Log rank $\chi^2$ test | P      | HR(95%CI)             | P      |
| Localized Tumor size (mm) |               | 905.565                | <0.001 |                       | <0.001 |
| 0-38                      | 54.2%         |                        |        | 0.544(0.498-0.594)    | <0.001 |
| 39-54                     | 36.7%         |                        |        | 1                     |        |
| 55-75                     | 30.7%         |                        |        | 1.381(1.242-1.536)    | <0.001 |
| ≥76 mm                    | 23.1%         |                        |        | 1.963(1.784-2.161)    | <0.001 |
| Regional Tumor size (mm)  |               | 516.254                | <0.001 |                       | <0.001 |
| 0-38                      | 37.1%         |                        |        | 0.600(0.536-0.671)    | <0.001 |
| 39-54                     | 14.7%         |                        |        | 1                     |        |
| 55-75                     | 10.9%         |                        |        | 1.254(1.117-1.409)    | <0.001 |

|                         |       |       |       |                    |        |
|-------------------------|-------|-------|-------|--------------------|--------|
| ≥76 mm                  | 11.0% |       |       | 1.753(1.586-1.937) | <0.001 |
| Distant Tumor size (mm) |       | 8.942 | 0.030 |                    | 0.001  |
| 0-38                    | 8.6%  |       |       | 0.910(0.755-1.096) | 0.320  |
| 39-54                   | 4.8%  |       |       | 1                  |        |
| 55-75                   | 6.4%  |       |       | 1.095(0.912-1.313) | 0.330  |
| ≥76 mm                  | 7.9%  |       |       | 1.193(1.023-1.391) | 0.024  |

NI: not included in multivariate survival analysis.

P values were adjusted for sex, age, race, pathological grading, marital status and tumor size as covariates between the two groups.
